# Supplementary material for: Genome-scale Capture C promoter interactions implicate effector genes at GWAS loci for bone mineral density
Source: PubMed Central journal article supplement (PMC6425012; doi:10.1038/s41467-019-09302-x), 2019-03-19
Supplement: 41467_2019_9302_MOESM1_ESM.pdf [file 41467_2019_9302_MOESM1_ESM.pdf]

## **SUPPLEMENTARY INFORMATION**

Genome-scale Capture C promoter interactions implicate effector genes at GWAS loci for bone mineral density

Chesi et al.

## SUPPLEMENTARY INFORMATION

Capture C coverage tracks in bigWig format for specific baits (for visualization in the UCSC Genome Browser) can be obtained using the following script, where hicup.bam is the output of the HiCUP pipeline and bait.bed contains the coordinates of the bait of interest in bed format.

```
module load bedtools  
  
perl get_captured_reads.pl --baits bait.bed hicup.bam  
bamToBed -i hicup.captured.bam > hicup.capture.bed  
subtractBed -a hicup.capture.bed -b bait.bed > hicup.captures.bed  
fetchChromSizes hg19 > hg19.chrom.sizes  
sortBed -i hicup.captures.bed | genomeCoverageBed -i - -bg -g hg19.chrom.sizes >  
bait.captures.bedGraph  
bedGraphToBigWig bait.captures.bedGraph hg19.chrom.sizes bait.bw
```

The BEDTools suite is available at <https://bedtools.readthedocs.io/en/latest/>,  
get\_captured\_reads.pl is a perl script provided as part of the HiCUP pipeline  
(<https://www.bioinformatics.babraham.ac.uk/projects/hicup/>) and fetchChromSizes is available  
from the UCSC team at  
[http://hgdownload.cse.ucsc.edu/admin/exe/linux.x86\\_64/fetchChromSizes](http://hgdownload.cse.ucsc.edu/admin/exe/linux.x86_64/fetchChromSizes).

## Supplementary Table 1

### A. Cell lines information

| Sample No. | Cell line name      | Sex | Age (Y) | Experiments                                                                                    |
|------------|---------------------|-----|---------|------------------------------------------------------------------------------------------------|
| 1          | 7043                | M   | 28.8    | ATAC-seq<br>(1 rep)                                                                            |
| 2          | 7078                | M   | 24.6    | RNA-seq<br>siRNA targeting (SFRP4, EPDR1, ING3, CPED1, WNT16)                                  |
| 3          | 8004                | M   | 22      | Capture C<br>ATAC-seq (3 rep)<br>RNA-seq<br>siRNA targeting (WNT16)                            |
| 4          | 8013                | M   | 22      | Capture C<br>ATAC-seq (3 rep)<br>RNA-seq<br>siRNA targeting (SFRP4, EPDR1, ING3, CPED1, WNT16) |
| 5          | 080454B<br>(Lonza2) | M   | 20      | Capture C<br>ATAC-seq (2 rep)<br>siRNA targeting (SFRP4, EPDR1, ING3, CPED1, WNT16)            |
| 6          | 8001R               | F   | 26      | siRNA targeting (SFRP4, EPDR1)                                                                 |

### B. qPCR primer sets

| Name      | Sequence                        |
|-----------|---------------------------------|
| hGAPDH_S  | TGG TAT CGT GGA AGG ACT CAT GAC |
| hGAPDH_AS | ATG CCA GTG AGC TTC CCG TTC AGC |
| hID1_S    | CTC TAC GAC ATG AAC GGC TGT     |
| hID1_AS   | TGC TCA CCT TGC GGT TCT G       |
| hALP_S    | GTA AGG ACA TCG CCT ACC AG      |
| hALP_AS   | GGC TTT CTC GTC ACT CTC AT      |
| hOSX_S    | GCT TGA GGA GGA AGT TCA CTA T   |
| hOSX_AS   | GCT TCT TTG TGC CTG CTT TG      |
| hRunx2_S  | CAG ACC AGC AGC ACT CCA TA      |
| hRunx2_AS | CAG CGT CAA CAC CAT CAT TC      |
| hSFRP4_S  | CTG TCT ATG ACC GTG GCG TG      |
| hSFRP4_AS | TGC CAA AGT TGG CTT CAC CT      |
| hEPDR1_S  | CGC AGC AGT GGG AGG G           |
| hEPDR1_AS | CTT TGA GCA CTG CTT GGT GG      |
| hING3_S   | GCT GGA TCA GGA ACT GGC TAA     |
| hING3_AS  | ACT GGC TGT GAA GGA GTG TC      |
| hCPED1_S  | GCC CCA CAA CTG CCA ATA TG      |
| hCPED1_AS | AGT GCC ATG TAC TTT CTG CCA     |
| hWNT16_S  | GTG CGG GAG CCA GTT CAG         |
| hWNT16_AS | CCT GCA GCC ATC ACA GCA TA      |
| hCEBPa_S  | GAT AAC CTT GTG CCT TGG AAA TG  |
| hCEBPa_AS | GAG GCA GGA AAC CTC CAA ATA     |
| hPPARg_S  | ATG TCG TGT CTG TGG AGA TAA     |
| hPPARg_AS | CCA AAC CTG ATG GCA TTA TGA G   |

## C. ON-TARGETplus siRNA

| Catalog Number     | Name                      | Target Sequence1      | Target Sequence 2    | Target Sequence 3    | Target Sequence 4    | mRNA Accession Number                       |
|--------------------|---------------------------|-----------------------|----------------------|----------------------|----------------------|---------------------------------------------|
| LQ-011388-00-0002  | ON-TARGETplus Human SFRP4 | GGAGAGAU CAGCU UAGUAA | CAACGGUGGUGGA UGUAAA | GGAGGAUGUUAAG UGGAUA | GAGCUAACUAGUU UCCAAA | NM_003014.3                                 |
| LQ-013378-01-0002  | ON-TARGETplus Human EPDR1 | CUACACUGGCAUA GCACGA  | GGACUAGAGUCC CUCGUA  | CUGGAGAAGAUGA GCGAAG | GAAGAAAAUUGAAU GGCGA | NM_001242946.1, NM_001242948.1, NM_017549.4 |
| LQ-007000-00-0002  | ON-TARGETplus Human ING3  | CUAUAAGCUUUG GAAGAU   | UGGCAAACCAGAU AUAUGA | CAACUAGAACAAG AGUCA  | GGGAAGAGCAAAU GGCAUC | NM_019071.2, NM_198267.1                    |
| LQ-018816-02-00002 | ON-TARGETplus Human CPED1 | GCUGAUUCAUCCA GAGGAA  | UGUGAUUCUJAAA GCGUAU | CUCAAUJUUGUU GUGGAU  | UGCCUUAGUUGUU CGGACA | NM_001105533.1, NM_024913.4                 |
| LQ-010821-00-0002  | ON-TARGETplus Human WNT16 | CCAAGUUGAUGUC AGUAGA  | CCGAUGAUGUCCA GUAUGG | GGCAGAGAAUGCA ACCGUA | GCAGAAAGUUCU AGAUUU  | NM_001105533.1, NM_024913.4                 |

## Supplementary Table 2

### Summary of Capture C interactions detected by CHiAGO

| Cell Type   | Res    | Bait Frags | Bait Frags with Interactions | Interactions | Trans Interactions | Bait-to-bait   | Median bait-PIR distance (bp) | Unique non-bait PIR | non-bait PIR interacting with a single bait frags | non-bait PIR interacting with >=4 bait frags |
|-------------|--------|------------|------------------------------|--------------|--------------------|----------------|-------------------------------|---------------------|---------------------------------------------------|----------------------------------------------|
| osteoblasts | 1-frag | 36,691     | 25,265 (69.0%)               | 168,721      | 1,684 (1%)         | 15,285 (9%)    | 14,934                        | 133,159             | 116,911 (88%)                                     | 689 (0.5%)                                   |
|             | 4-frag | 34,354     | 26,310 (77.0%)               | 215,992      | 1,416 (1%)         | 36,343 (17%)   | 105,174                       | 121,829             | 86,931 (71%)                                      | 5,302 (4%)                                   |
|             | merged |            |                              | 295,422      | 2,076 (1%)         | 41,459 (14%)   | 50,459                        | 209,370             | 176,241 (84%)                                     | 2,295 (1%)                                   |
| HepG2       | 1-frag | 36,691     | 22,377 (61.0%)               | 65,523       | 1,007 (1.5%)       | 10,304 (15.7%) | 9,846                         | 49,253              | 44,693 (90.74%)                                   | 296 (0.60%)                                  |
|             | 4-frag | 34,354     | 23,633 (68.8%)               | 107,644      | 858 (0.80%)        | 29,619 (27.5%) | 72,417                        | 55,566              | 42,344 (76.20%)                                   | 2,167 (3.90%)                                |
|             | merged |            |                              | 135,034      | 1,353 (1.00%)      | 33,546 (24.8%) | 42,223                        | 84,720              | 72,909 (86.06%)                                   | 1,072 (1.27%)                                |

## Supplementary Table 3

### ENCODE histone marks tracks from primary human osteoblasts

| Cell Type   | Species      | ChIP antibody Target | GEO Accession | File Type     | Lab                         |
|-------------|--------------|----------------------|---------------|---------------|-----------------------------|
| osteoblasts | Homo Sapiens | CTCF                 | GSM733784     | broadPeak.bed | Bernstein - Broad Institute |
| osteoblasts | Homo Sapiens | H3K27ac              | GSM733739     | broadPeak.bed | Bernstein - Broad Institute |
| osteoblasts | Homo Sapiens | H3K27me3             | GSM1003466    | broadPeak.bed | Bernstein - Broad Institute |
| osteoblasts | Homo Sapiens | H3K36me3             | GSM733721     | broadPeak.bed | Bernstein - Broad Institute |
| osteoblasts | Homo Sapiens | H3K4me1              | GSM733704     | broadPeak.bed | Bernstein - Broad Institute |
| osteoblasts | Homo Sapiens | H3K4me2              | GSM733779     | broadPeak.bed | Bernstein - Broad Institute |
| osteoblasts | Homo Sapiens | H3K4me3              | GSM1003506    | broadPeak.bed | Bernstein - Broad Institute |
| osteoblasts | Homo Sapiens | H3K9me3              | GSM733681     | broadPeak.bed | Bernstein - Broad Institute |

## Supplementary Figure 1

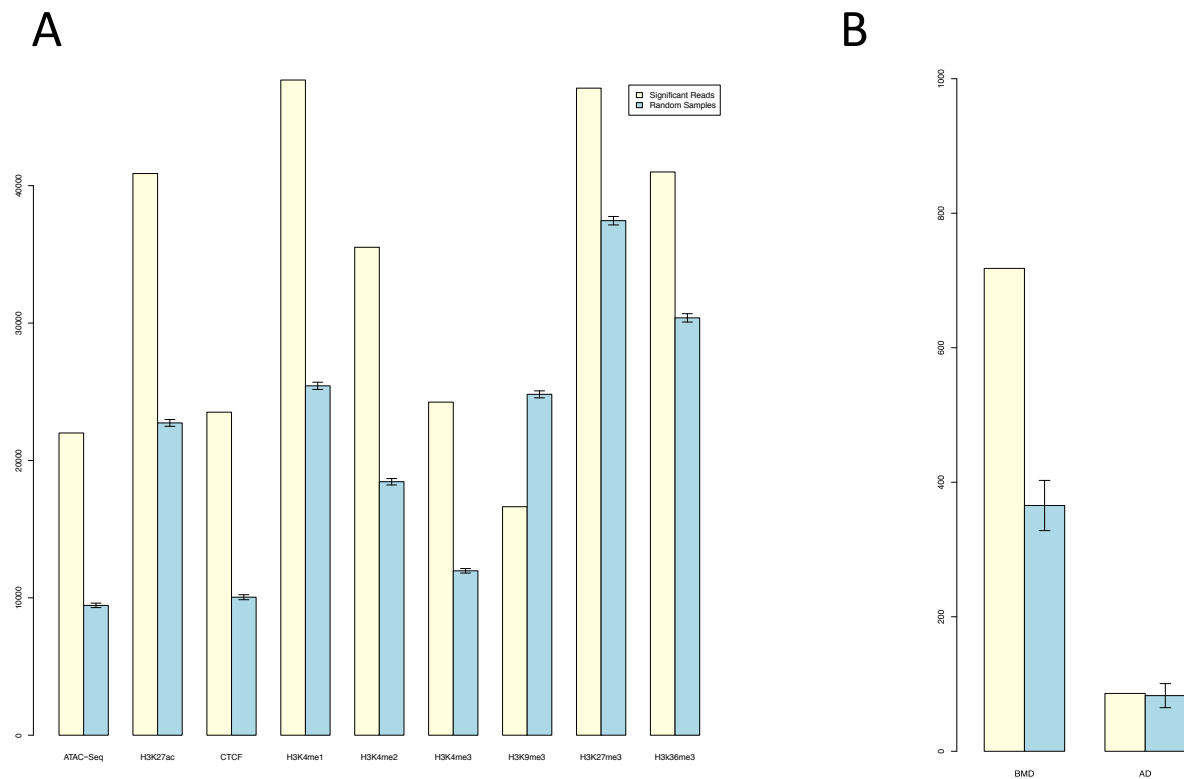

**Promoter-interacting regions (PIR) enrichment.** (A) Enrichment of PIR in chromatin marks. Yellow bars: number of overlaps with significant (CHICAGO score>5) cis-interacting fragments (at 4-fragment resolution; bait-to-bait interactions were excluded); blue bars: expected overlaps based on 100 random subsets of fragments with a similar distribution of distances from the baits. ATAC-seq data is from our own experiments in hMSC-derived osteoblasts; other markers are from primary human osteoblasts from the ENCODE project. Error bars represent 95% confidence intervals. (B) Enrichment of PIR in BMD GWAS signals. As above, but overlaps are computed with BMD or Alzheimer's disease GWAS SNPs and their proxies ( $r^2>0.4$ ).

## Supplementary Figure 2

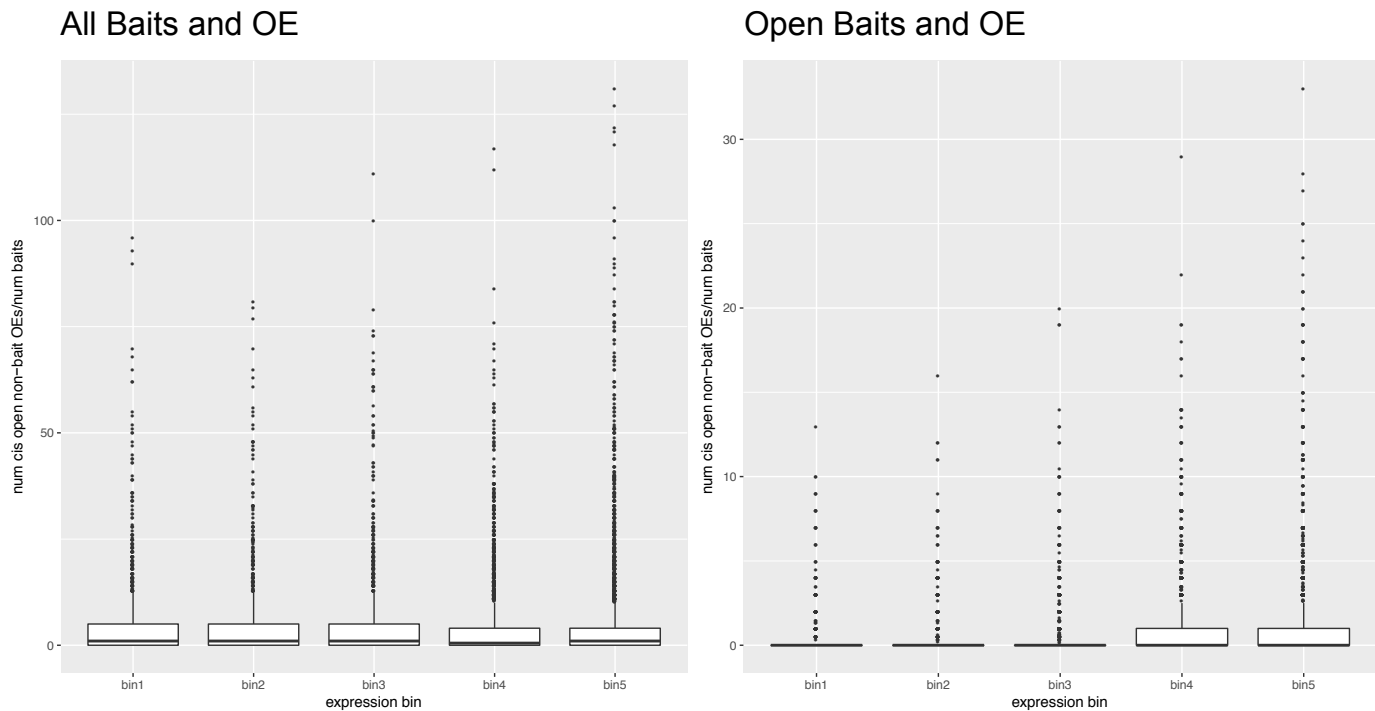

**Correlation between number of 3D contacts per bait and gene expression.** The number of contacts per bait correlates with gene expression, but only when considering open promoters and open PIR. Boxplots of the number of (cis) contacts per bait (at 4-fragment resolution; bait-to-bait interactions were excluded) for each quintile of expression of the baited gene(s). The horizontal line represents the median, the lower and upper hinges correspond to the 25<sup>th</sup> and 75<sup>th</sup> percentiles, and outliers ( $> 1.5 * \text{IQR}$  from the hinges, indicated by the whiskers) are plotted as single dots. Left: all baits and PIR. Right: open baits and open PIR only.





# B

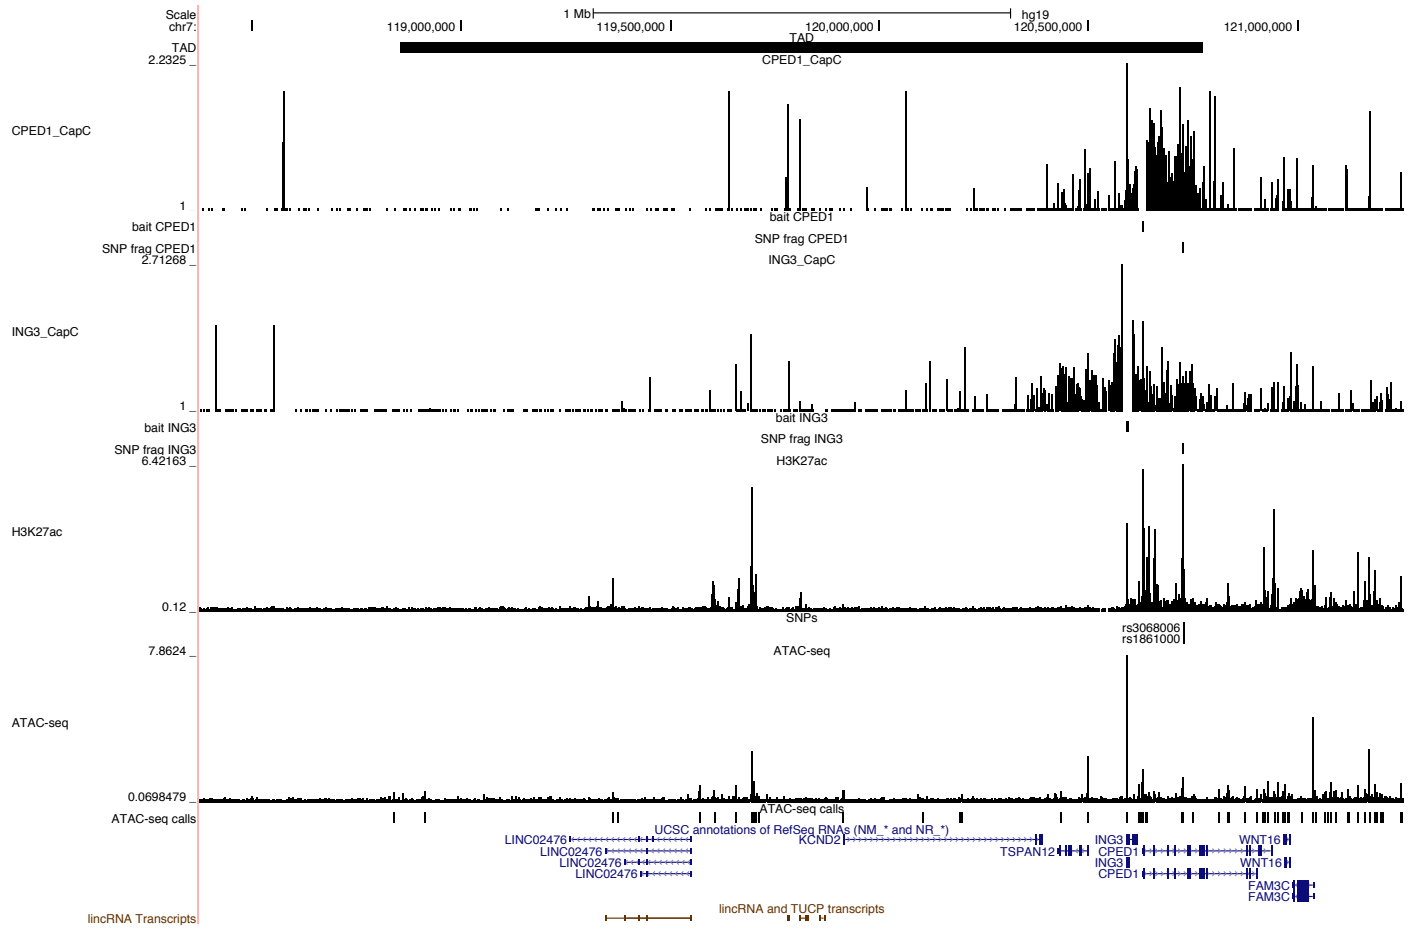

C

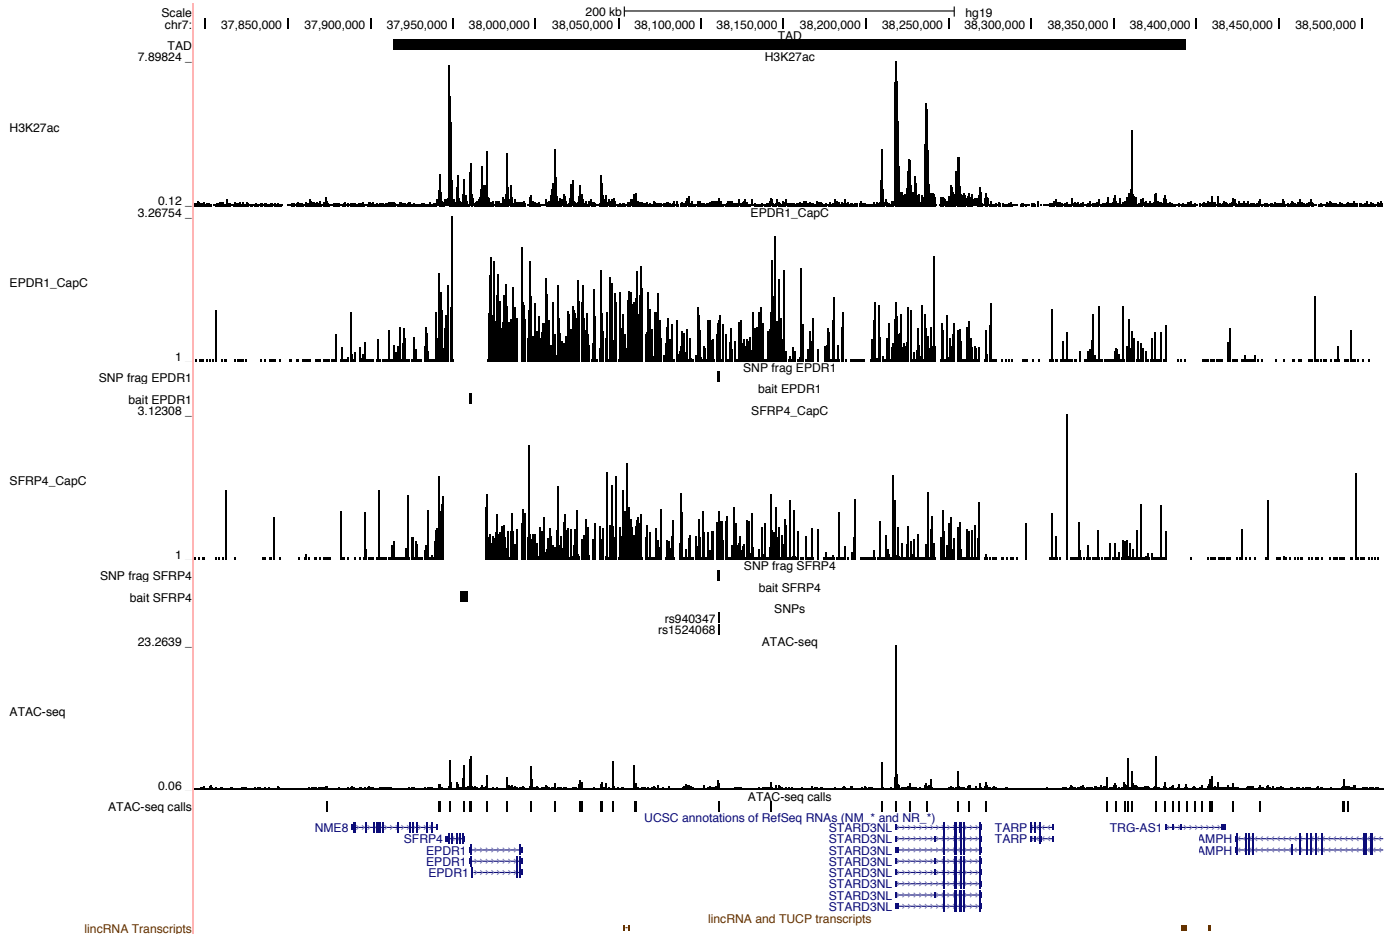

**D**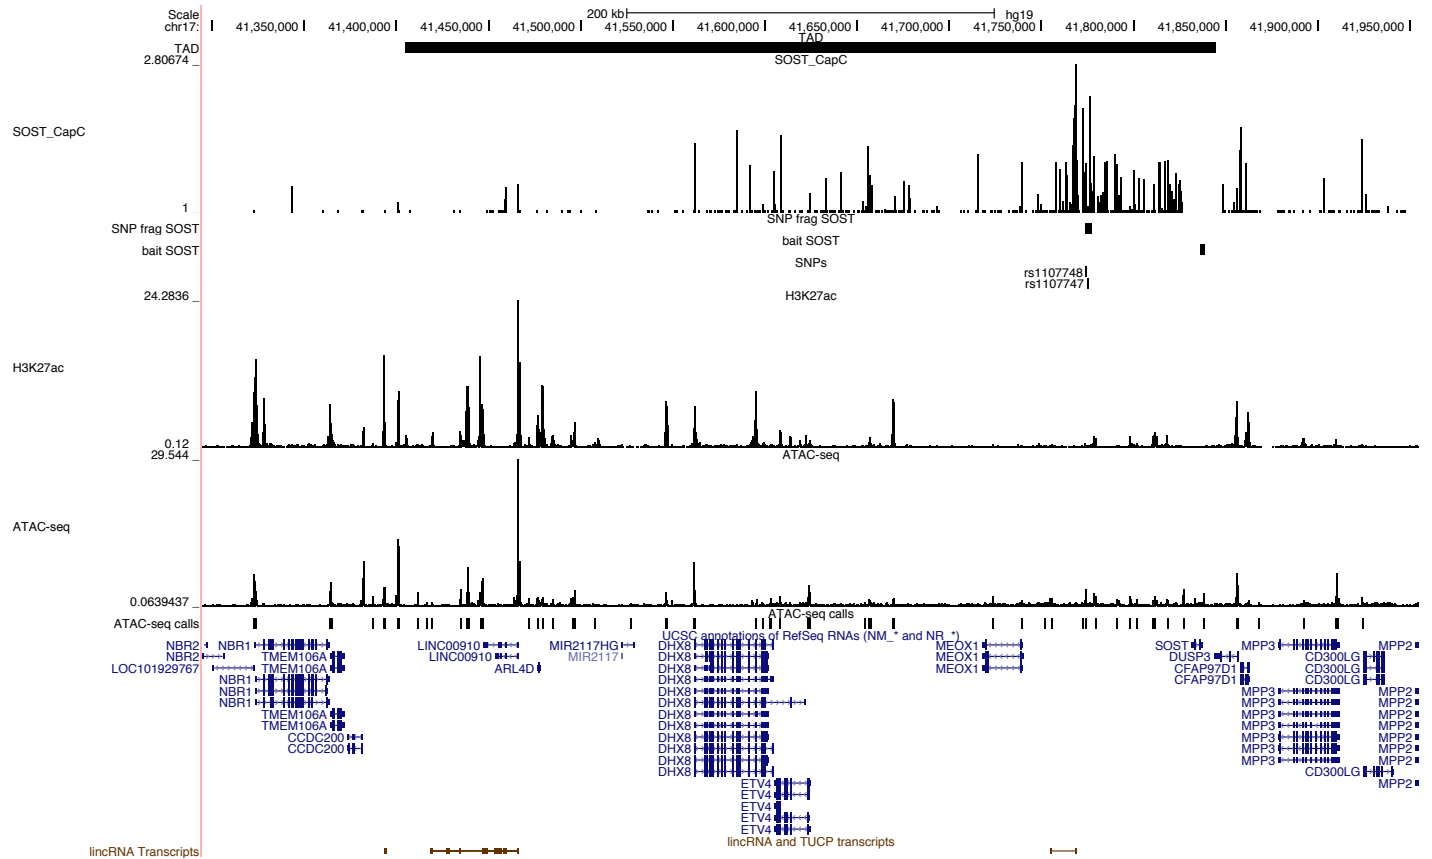

**Capture C and ATAC-seq coverage tracks from hMSC-derived osteoblasts.** Tracks are shown in the UCSC genome browser in BigWig format, from 3 and 9 replicates, respectively (see Supplementary Table 1 for details). ATAC-seq peak calls from our pipeline and H3K27ac ChIP-seq track from human primary osteoblasts from ENCODE (GEO accession GSM733739) are also shown in BED and bigWig format, respectively. SNP and bait fragments are indicated. (A) *SMAD3*, (B) *CPED1*, (C) *STARD3NL* and (D) *SOST*.

# Supplementary Figure 4

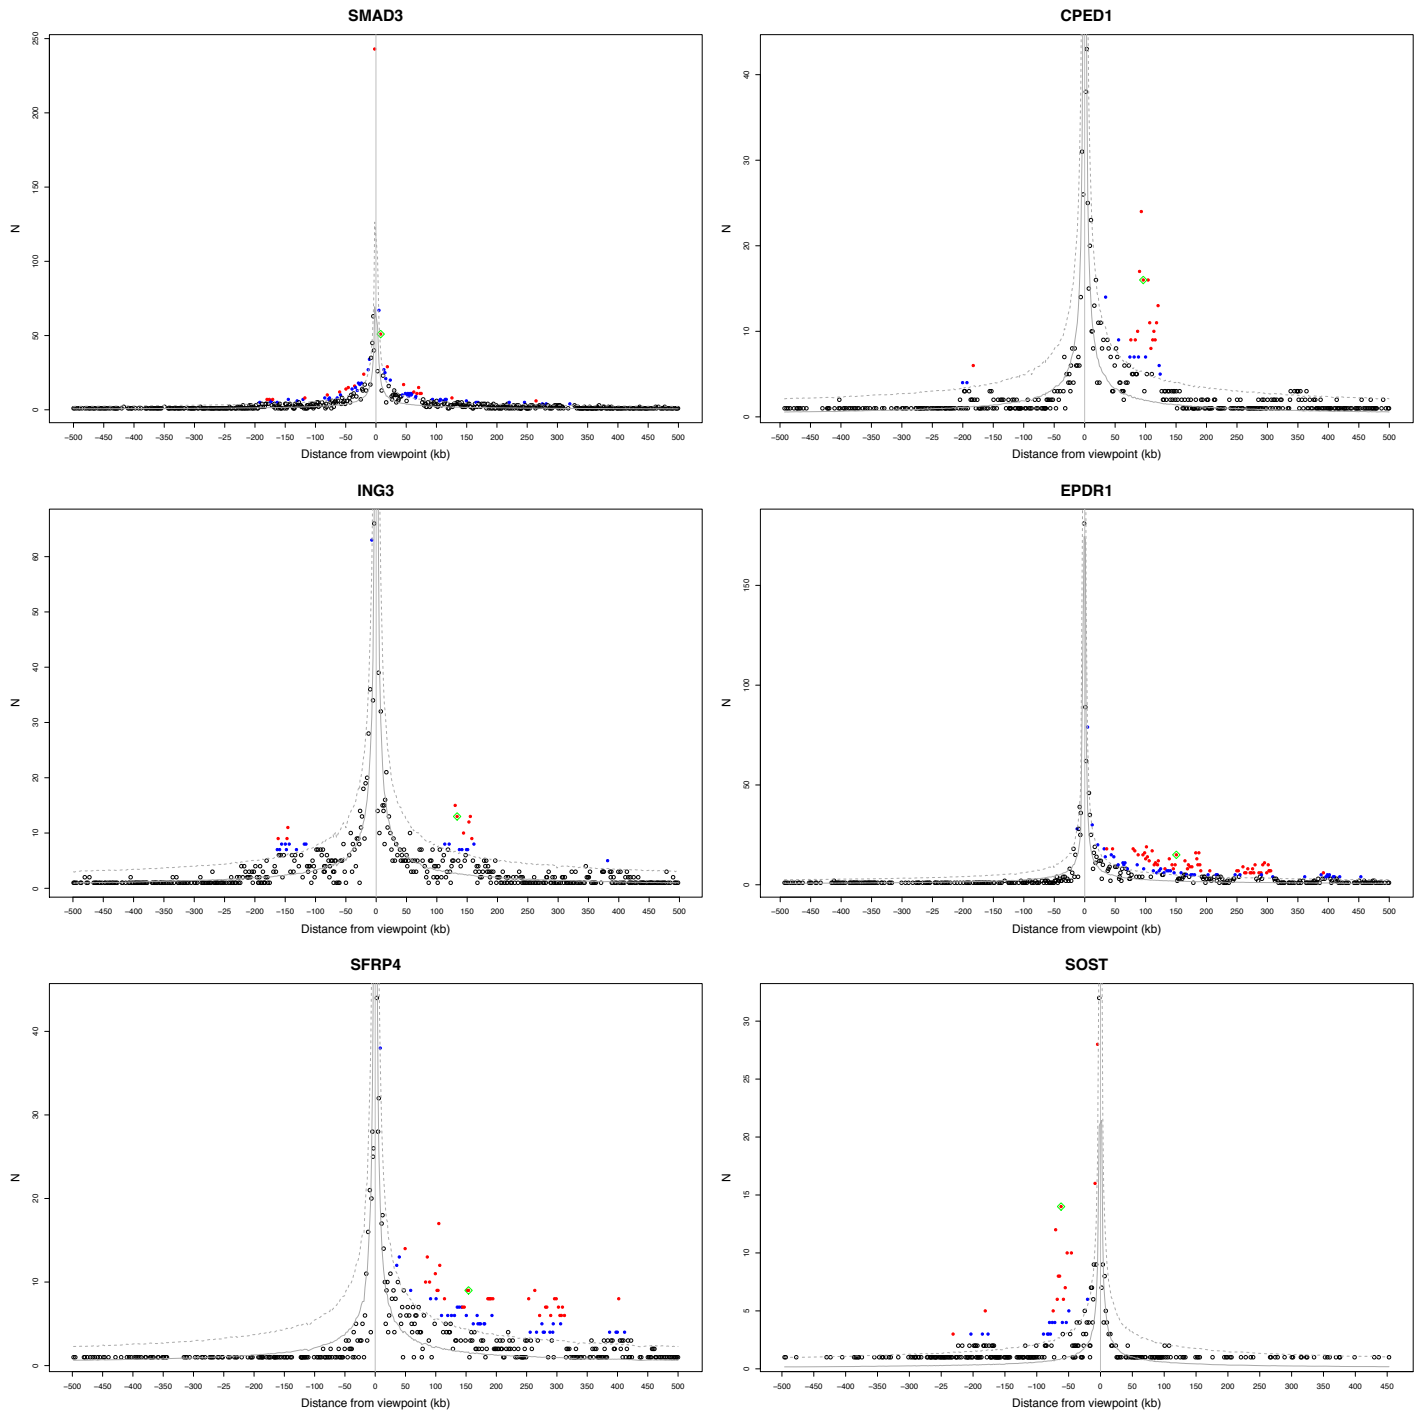

**Examples of interactions called by CHiCAGO.** Plots of the Capture C raw read counts versus linear distance from bait for the five loci analyzed more in depth in this study, plus *SOST* (as a positive control). Significant interactions (CHiCAGO score  $>5$ ) are labelled in red, near-significant (CHiCAGO score  $>3$ ) in blue. A region of 1Mb around the bait is shown. CHiCAGO-generated expected counts and their 95% confidence intervals are shown as solid and dashed grey lines, respectively. Data points representing significant interactions with regions containing GWAS proxy SNPs are highlighted with a green diamond.

## Supplementary Figure 5

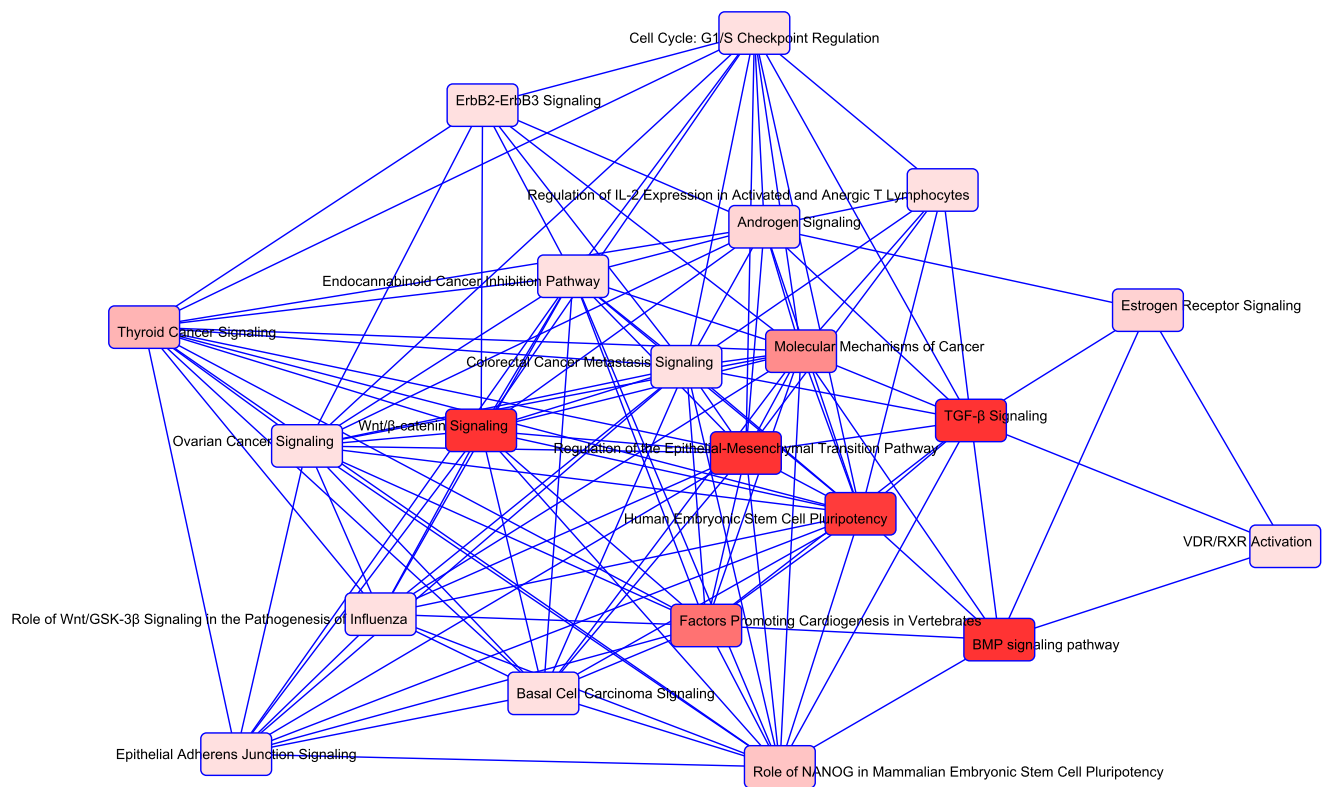

**Canonical pathways enriched in implicated genes in osteoblasts.** The genes were implicated by ATAC-seq plus Capture C in hMSC-derived osteoblasts using a  $r^2 > 0.4$  threshold for proxy SNPs of 273 BMD GWAS loci. The network shows each pathway as a single “node” colored proportionally to the B-H multiple testing corrected p-value, where brighter red = more significant. A line connects any two pathways when they have at least two implicated genes in common between them. The analysis was performed using Ingenuity Pathway Analysis software.

## Supplementary Figure 6

A. *ING3*

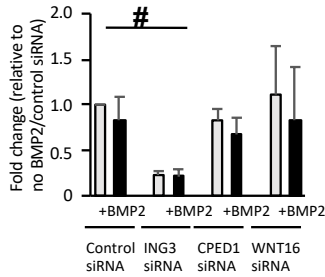

B. *CPED1*

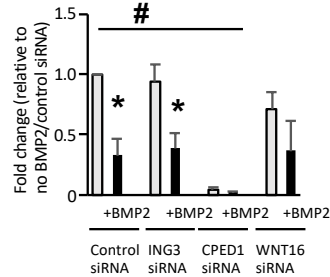

C. *WNT16*

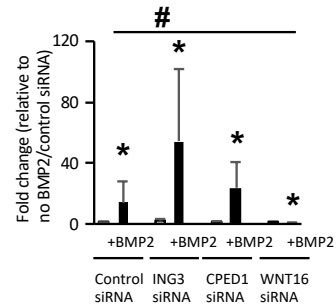

D. *SP7*

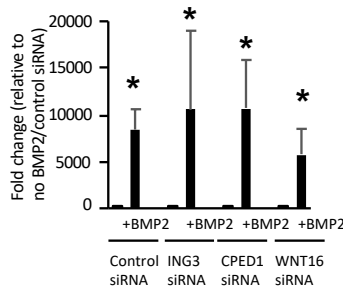

E. *SFRP4*

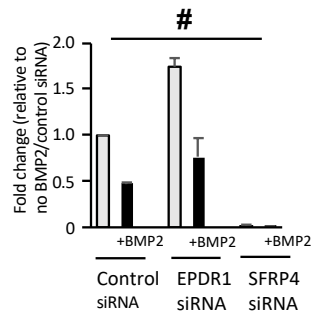

F. *EPDR1*

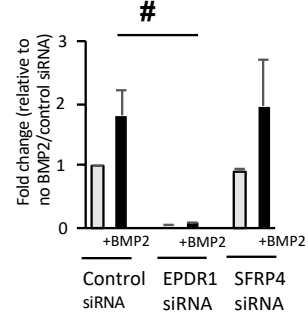

G. *SP7*

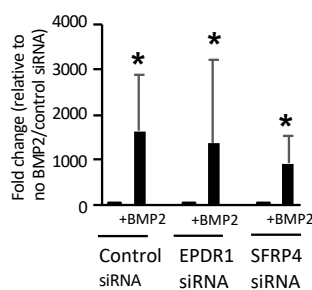

H. *ING3*

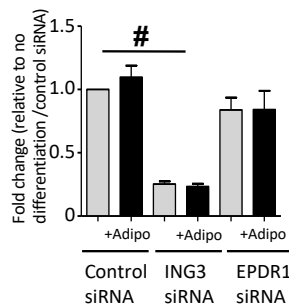

I. *EPDR1*

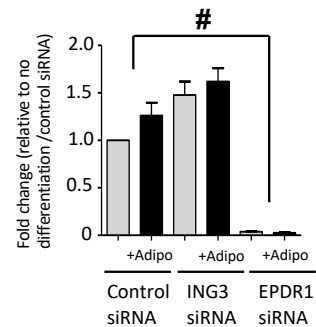

**Proof of successful knockdown for the two GWAS loci analyzed.** Quantitative gene expression in hMSC-derived osteoblasts (A-G) and adipocytes (H, I). (A-C) Knockdowns of *ING3*, *CPED1* and *WNT16* at the *CPED1* locus. (D) *SP7* expression when knocking down genes at the *CPED1* locus. (E-F) Knockdowns of *SFRP4* and *EPDR1* at the *STARD3NL* locus.

(G) *SP7* expression when knocking down genes at the *STARD3NL* locus. (H, I) Knockdowns of *ING3* and *EPDR1* in hMSC-derived adipocytes. Grey columns = No treatment; Black columns = differentiation treatment (BMP or adipogenic differentiation). Columns = mean. Error bars = Standard deviation. n=4 (for *ING3*, *CPED1* and *WNT16* siRNA with BMP treatment), n=3 (for *SFRP4* and *EPDR1* siRNA with BMP2 treatment) and n=4 (for *ING3* and *EPDR1* siRNA with adipogenic differentiation) unique donor lines. \*, p<0.05 comparing No treatment to treatment for each siRNA. #, p<0.05 comparing control siRNA to siRNA for gene of interest (2-way homoscedastic Student's t-tests). Source data are provided as a Source Data file.



## Supplementary Figure 7

A.

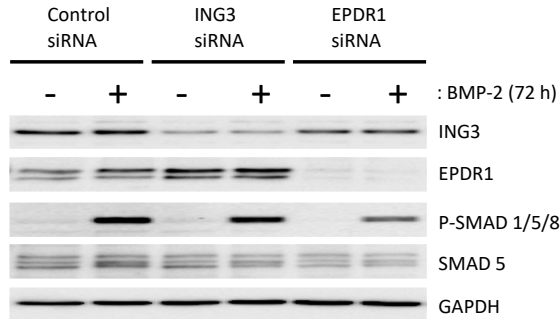

B. ING3 quantification

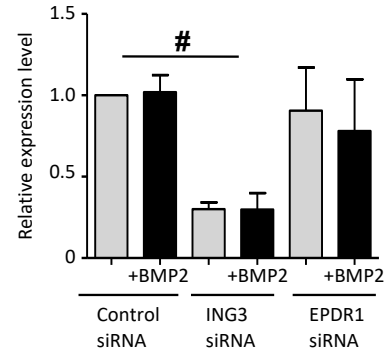

C. EPDR1 quantification

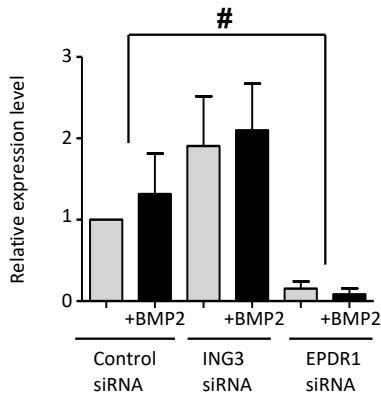

D. P-SMAD/SMAD quantification

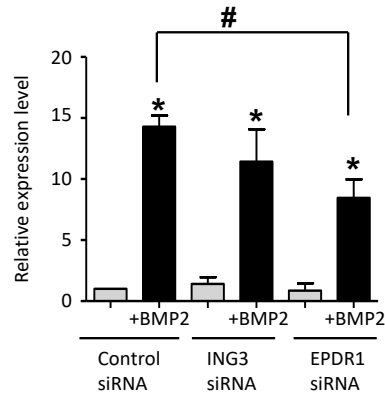

**ING3 and EPDR1 siRNA decreases protein levels of respective targets.** (A) Total cell lysates from *ING3* and *EPDR1* siRNA transfected cells co-stimulated with BMP2 for 72 h were processed for immunoblot analysis with antibodies as indicated. A representative result of 4 different hMSC donor line is shown. (B-D) Relative band intensities from each hMSC donor cell line were combined and presented as relative expression compared to control siRNA transfected sample. Grey columns = No BMP treatment; Black columns = BMP treatment. Columns = mean. Error bars = Standard deviation. n=4 unique donor lines. \*, p<0.05 comparing No treatment to BMP treatment for each siRNA. #, p<0.05 comparing control siRNA to siRNA

for gene of interest (2-way homoscedastic Student's t-tests). Source data are provided as a Source Data file.
